# Supplementary material for: Variability in compression pressure of multi-layer bandaging applied by lymphedema therapists
Source: Springer Nature journal article supplement (doi:10.1007/s00520-018-4385-9), 2018-08-07
Supplement: MOESM1 [file 16016922]

## Sheet: Sheet1
no.	Occupation	age	sex	training course	year of finishing training	clinical experience	target pressure in clinical situation (mmHg)	target pressure in this study (mmHg)	compression pressure phase 1 (mmHg)	compression pressure phase 2 (mmHg)	compression pressure phase 3 (mmHg)	model
1	licensed masseur	44	female	B	2014	Yes	Yes	40	35	33	31	1
2	nurse	49	female	C	2012	Yes	Yes	40	58	56	56	1
3	licensed masseur	44	female	A	2010	Yes	Yes	60	72	62	54	2
4	judo therapist	54	female	D	2010	Yes	Yes	60	48	44	39	1
5	licensed masseur	35	female	A	2015	Yes	Yes	60	72	66	66	2
6	licensed masseur	41	female	A	2014	Yes	No	30	46	46	42	3
7	licensed masseur	48	female	A	2016	Yes	No	60	52	50	50	3
8	nurse	55	female	A	2014	Yes	No	NA	51	51	41	2
9	licensed masseur	33	male	F	2017	Yes	No	45	52	42	41	1
10	nurse	47	female	B	2012	Yes	No	50	57	55	51	2
11	nurse	51	female	B	2012	No	No	NA	65	67	58	2
12	judo therapist	39	female	A	2013	No	No	40	78	74	65	1
13	licensed masseur	56	female	A	2012	No	No	60	26	26	24	1
14	licensed masseur	49	female	B	2001	Yes	Yes	30	47	43	35	1
15	licensed masseur	31	female	B	2013	No	No	30	41	40	36	2
16	licensed masseur	52	female	B	2016	No	No	40	66	63	58	1
17	nurse	45	female	E	2016	No	No	50	42	40	41	2
18	licensed masseur	55	female	A	2016	No	No	40	74	69	64	2
19	nurse	42	female	B	2016	No	No	50	51	43	46	1
20	nurse	44	female	A	2015	No	No	60	82	73	64	1
21	nurse	43	female	C	2016	No	No	50	32	31	30	2
22	licensed masseur	41	female	D	2005	Yes	Yes	50	59	55	52	2
23	licensed masseur	61	female	A	2014	No	No	70	56	55	54	2
24	licensed masseur	46	male	D	2004	Yes	Yes	55	80	74	65	2
25	licensed masseur	42	female	A	2016	No	No	70	50	47	40	1
26	nurse	41	female	A	2016	No	No	50	53	55	46	2
27	licensed masseur	43	male	A	2015	No	No	60	42	42	40	1
28	nurse	50	female	E	2013	No	No	40	30	29	29	1
29	nurse	49	female	C	2014	No	No	40	19	18	21	1
30	nurse	34	female	B	2013	No	No	40	22	14	16	1
31	nurse	48	female	B	2015	No	No	30	22	21	21	1
32	nurse	44	female	C	2014	No	No	40	38	32	30	1
33	licensed masseur	34	female	A	2016	No	Yes	70	44	44	41	1
34	licensed masseur	32	female	A	2016	No	No	40	28	27	25	2
35	nurse	48	female	A	2017	No	Yes	50	54	53	49	1
36	nurse	49	female	A	2017	No	Yes	50	58	56	55	1
37	nurse	26	female	A	2017	No	No	55	72	59	56	1
38	nurse	66	female	A	2017	No	No	45	85	81	75	1
39	nurse	49	female	A	2017	No	No	55	51	45	42	1
40	nurse	47	female	A	2017	No	No	50	46	48	43	2
41	nurse	32	female	A	2017	No	No	50	60	55	52	2
42	nurse	54	female	A	2017	No	No	50	67	60	61	2
43	physiotherapist	30	female	A	2017	No	No	50	72	68	64	2
44	physiotherapist	25	female	A	2017	No	No	60	43	47	45	2
45	licensed masseur	23	male	B	2014	Yes	Yes	30	26	23	22	2
46	licensed masseur	40	female	B	2012	Yes	Yes	35	60	60	54	2
47	licensed masseur	43	female	B	2006	Yes	Yes	35	51	50	43	2
48	licensed masseur	34	female	A	2016	Yes	No	65	58	55	53	2
